# Supplementary material
Source: PubMed Central journal article supplement (PMC3416042)
Supplement: NIHMS393667-supplement-Supplemental_figures.pdf [file NIHMS393667-supplement-Supplemental_figures.pdf]

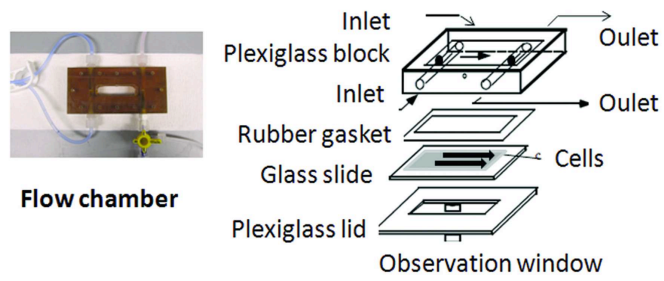

Supplemental Fig. 1 Flow chamber. The flow chamber consisted of a 1mm thick borosilicate glass plate glued into the bottom of a uniformly deep groove milled into a Plexiglas block, and another glass slide with pre-seeded cells. The two plates were held together with screws and a Plexiglas lid, separated by a uniform thickness rectangular silastic spacer (McMaster). As a result, a flow chamber (5.2 cm long x 1.2cm wide x 154 $\mu$ m high) was created. Flow inlets and outlets were connected to cylindrical reservoirs in the Plexiglas block. A 2mm thick borosilicate glass blocked each of the cylindrical reservoirs in the middle, and separated the flows to and from the two ports. Plastic tubing (high-temperature silicone rubber soft tubing, 1.59mm ID, 3.18mm OD, McMaster) connected the inlet port to one-direction syringe pump (Harvard) and the outlet port to the waste collecting bottles.

| Flow Chamber: Cell culture area 624 mm <sup>2</sup> |                      |              |
|-----------------------------------------------------|----------------------|--------------|
| L                                                   | W                    | H            |
| 52 mm                                               | 12 mm                | 0.154 mm     |
| Flow Rate: Q                                        | Shear Stress: $\tau$ | Reynolds: Re |
| 8 $\mu$ l/min x 2                                   | 5.6 mPa              | 0.044        |
| 4 $\mu$ l/min x 2                                   | 2.8 mPa              | 0.022        |

**A: Simulation: Q=4  $\mu$ l/min x2**

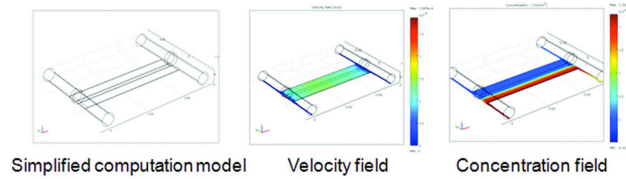

**B: Flow chamber: 4  $\mu$ l/min x2**

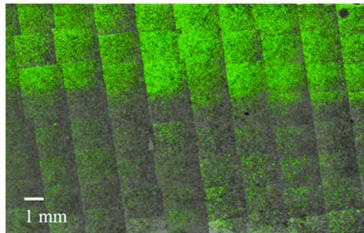

Supplemental Fig. 2: Characterization of flow chamber. A: Simplified flow models, the steady-state velocity and concentration profiles are shown for the flow channel at flow rate of 4  $\mu$ l/min x2. Data were calculated for the diffusion coefficient  $D_{Dox}=3.93 \times 10^{-6}$  cm<sup>2</sup>/s, fluid viscosity  $\nu=10^{-3}$  Pa\*s, fluid density  $\rho=103$  kg/m<sup>3</sup>, and inlet concentrations  $C_{Dox}=1$  ng/ml=  $2.25 \times 10^{-12}$  mol/ml and  $C_{Dox}=0$  ng/ml= 0. B: Separation of Calcein stain in the flow channel at the flow rates of 4  $\mu$ l/min x 2. Data are for the diffusion coefficient of Calcein  $D_{Calcein}=2.6 \times 10^{-6}$  cm<sup>2</sup>/s, and inlet concentrations of Calcein  $C_+=2$   $\mu$ M and  $C_-=0$ , diffusion coefficient of Flow direction is left to right. Original magnification: 100X. Scale bar: 1mm.

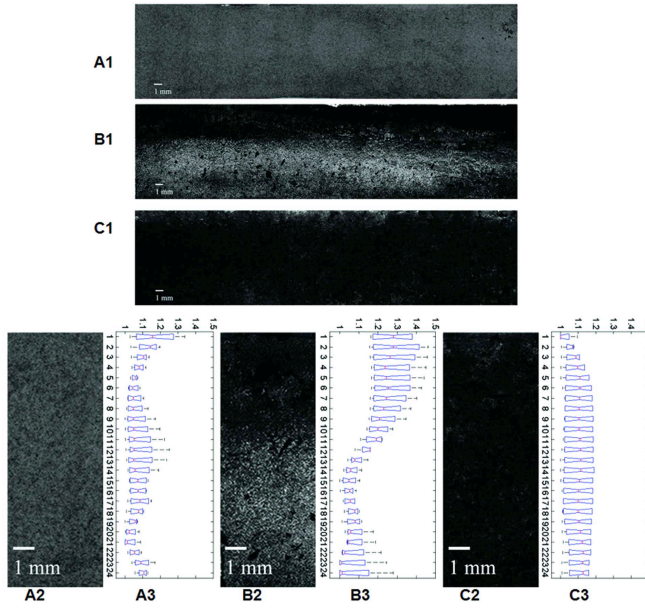

Supplemental Fig. 3: Dox dependent osteogenic differentiation in flow chamber. C9 cells were cultured in osteogenic differentiation medium in a perfused flow chamber, at a flow rate of 4 $\mu$ l/min x2, for 3 weeks. Images show von Kossa staining of calcium deposition for selected conditions: (A1, A2) Perfusion medium with Dox 1ng/ml (top) / 1ng/ml (bottom); (B1, B2) Perfusion medium: Dox 0ng/ml (top) / 1ng/ml (bottom); (C1, C2) Perfusion medium: Dox 0ng/ml (top) / 0ng/ml (bottom). (A3, B3, C3) Intensity of calcium staining, obtained by pooling repeated experiments (n=4 per condition). The staining of the deposited calcium is expressed at the ratio of the normalized sum of segmented (~0.25mm) image intensity and the minimum intensity along the y axis (the width) of the chamber. Data were processed using Matlab R2007 program. Flow direction: left to right. Scale bar: 1mm

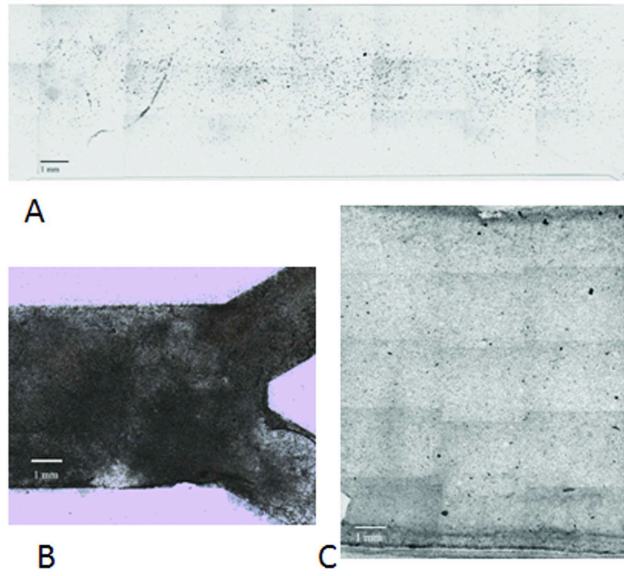

Supplemental Fig. 4: The effect of flow rate to osteogenic differentiation. A: von Kossa staining of the fluidic channel, at flow rate of 5 $\mu$ l/min x2. Perfusion medium: Dox 0ng/ml (top) / 1ng/ml (bottom); B: von Kossa staining of the fluidic channel, at flow rate of 0.5 $\mu$ l/min x2. Perfusion medium: Dox 0ng/ml (top) / 0ng/ml (bottom); C: von Kossa staining fragment of the fluidic chamber, at flow rate of 8 $\mu$ l/min x2. Perfusion medium: Dox 0ng/ml (top) / 0ng/ml (bottom).

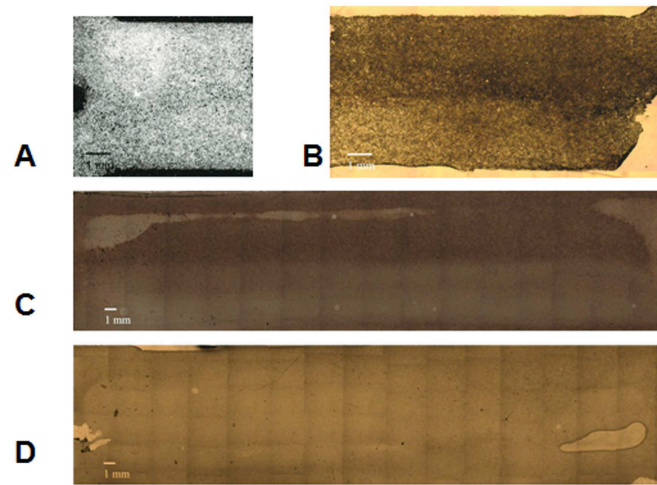

Supplemental Fig. 5: Cell distribution and BSP staining. A: Phase contrast image of cell distribution in fluidic channel after 3 weeks osteogenic differentiation at flow rate of  $1\mu\text{l}/\text{min} \times 2$ . Perfusion medium: Dox  $0\text{ng}/\text{ml}$  (top) /  $1\text{ng}/\text{ml}$  (bottom). B: BSP staining of the cells after 3 weeks patterned osteogenic differentiation in fluidic channel at flow rate of  $1\mu\text{l}/\text{min} \times 2$ . Perfusion medium: Dox  $0\text{ng}/\text{ml}$  (top) /  $1\text{ng}/\text{ml}$  (bottom). C: BSP staining of the cells after 3 weeks patterned osteogenic differentiation in fluidic chamber at flow rate of  $4\mu\text{l}/\text{min} \times 2$ . Perfusion medium: Dox  $0\text{ng}/\text{ml}$  (top) /  $1\text{ng}/\text{ml}$  (bottom); D: Perfusion medium: Dox  $1\text{ng}/\text{ml}$  (top) /  $1\text{ng}/\text{ml}$  (bottom); Flow direction: left to right.
